# Supplementary material for: Predicting Progression of Autosomal Dominant Polycystic Kidney Disease by Changes in the Telomeric Epigenome
Source: MDPI journal article supplement (doi:10.3390/cells11203300), 2022-10-20
Supplement: s1 [file s1]

| <b>Supp. Table S1. List of genes localized on human chromosome 16p</b> |                    |                                                                               |
|------------------------------------------------------------------------|--------------------|-------------------------------------------------------------------------------|
| <b>Symbol(↓)</b>                                                       | <b>Location(↓)</b> | <b>Description</b>                                                            |
| DDX11L10                                                               | 16p13.3            | DEAD/H-box helicase 11 like 10 (pseudogene)                                   |
| WASIR2                                                                 | 16p13.3            | WASH and IL9R antisense RNA 2                                                 |
| POLR3K                                                                 | 16p13.3            | RNA polymerase III subunit K                                                  |
| SNRNP25                                                                | 16p13.3            | small nuclear ribonucleoprotein U11/U12 subunit 25                            |
| RHBDF1                                                                 | 16p13.3            | rhomboid 5 homolog 1                                                          |
| MPG                                                                    | 16p13.3            | N-methylpurine DNA glycosylase                                                |
| NPRL3                                                                  | 16p13.3            | NPR3 like, GATOR1 complex subunit                                             |
| HBZ                                                                    | 16p13.3            | hemoglobin subunit zeta                                                       |
| HBM                                                                    | 16p13.3            | hemoglobin subunit mu                                                         |
| HBA2                                                                   | 16p13.3            | hemoglobin subunit alpha 2                                                    |
| HBA1                                                                   | 16p13.3            | hemoglobin subunit alpha 1                                                    |
| HBQ1                                                                   | 16p13.3            | hemoglobin subunit theta 1                                                    |
| LUC7L                                                                  | 16p13.3            | LUC7 like                                                                     |
| FAM234A                                                                | 16p13.3            | family with sequence similarity 234 member A                                  |
| FAM234A                                                                | 16p13.3            | family with sequence similarity 234 member A                                  |
| RGS11                                                                  | 16p13.3            | regulator of G protein signaling 11                                           |
| ARHGDIG                                                                | 16p13.3            | Rho GDP dissociation inhibitor gamma                                          |
| PDIA2                                                                  | 16p13.3            | protein disulfide isomerase family A member 2                                 |
| AXIN1                                                                  | 16p13.3            | axin 1                                                                        |
| MRPL28                                                                 | 16p13.3            | mitochondrial ribosomal protein L28                                           |
| PGAP6                                                                  | 16p13.3            | post-glycosylphosphatidylinositol attachment to proteins 6                    |
| NME4                                                                   | 16p13.3            | NME/NM23 nucleoside diphosphate kinase 4                                      |
| DECR2                                                                  | 16p13.3            | 2,4-dienoyl-CoA reductase 2                                                   |
| RAB11FIP3                                                              | 16p13.3            | RAB11 family interacting protein 3                                            |
| LINC00235                                                              | 16p13.3            | long intergenic non-protein coding RNA 235                                    |
| CAPN15                                                                 | 16p13.3            | calpain 15                                                                    |
| PRR35                                                                  | 16p13.3            | proline rich 35                                                               |
| NHLRC4                                                                 | 16p13.3            | NHL repeat containing 4                                                       |
| PIGQ                                                                   | 16p13.3            | phosphatidylinositol glycan anchor biosynthesis class Q                       |
| RAB40C                                                                 | 16p13.3            | RAB40C, member RAS oncogene family                                            |
| WFIKKN1                                                                | 16p13.3            | WAP, follistatin/kazal, immunoglobulin, kunitz and netrin domain containing 1 |
| METTL26                                                                | 16p13.3            | methyltransferase like 26                                                     |
| METTL26                                                                | 16p13.3            | methyltransferase like 26                                                     |
| MCRIP2                                                                 | 16p13.3            | MAPK regulated corepressor interacting protein 2                              |
| MCRIP2                                                                 | 16p13.3            | MAPK regulated corepressor interacting protein 2                              |
| WDR90                                                                  | 16p13.3            | WD repeat domain 90                                                           |
| RHOT2                                                                  | 16p13.3            | ras homolog family member T2                                                  |
| RHBDL1                                                                 | 16p13.3            | rhomboid like 1                                                               |
| STUB1                                                                  | 16p13.3            | STIP1 homology and U-box containing protein 1                                 |
| JMJD8                                                                  | 16p13.3            | jumonji domain containing 8                                                   |
| WDR24                                                                  | 16p13.3            | WD repeat domain 24                                                           |
| FBXL16                                                                 | 16p13.3            | F-box and leucine rich repeat protein 16                                      |

|          |         |                                                                 |
|----------|---------|-----------------------------------------------------------------|
| METRNL   | 16p13.3 | meteorin, glial cell differentiation regulator                  |
| ANTKMT   | 16p13.3 | adenine nucleotide translocase lysine methyltransferase         |
| CCDC78   | 16p13.3 | coiled-coil domain containing 78                                |
| HAGHL    | 16p13.3 | hydroxyacylglutathione hydrolase like                           |
| CIAO3    | 16p13.3 | cytosolic iron-sulfur assembly component 3                      |
| CIAO3    | 16p13.3 | cytosolic iron-sulfur assembly component 3                      |
| MSLN     | 16p13.3 | mesothelin                                                      |
| RPUSD1   | 16p13.3 | RNA pseudouridine synthase domain containing 1                  |
| CHTF18   | 16p13.3 | chromosome transmission fidelity factor 18                      |
| GNG13    | 16p13.3 | G protein subunit gamma 13                                      |
| PRR25    | 16p13.3 | proline rich 25                                                 |
| LMF1     | 16p13.3 | lipase maturation factor 1                                      |
| LMF1-AS1 | 16p13.3 | LMF1 antisense RNA 1                                            |
| CEROX1   | 16p13.3 | cytoplasmic endogenous regulator of oxidative phosphorylation 1 |
| SOX8     | 16p13.3 | SRY-box transcription factor 8                                  |
| SSTR5    | 16p13.3 | somatostatin receptor 5                                         |
| C1QTNF8  | 16p13.3 | C1q and TNF related 8                                           |
| CACNA1H  | 16p13.3 | calcium voltage-gated channel subunit alpha1 H                  |
| TPSG1    | 16p13.3 | tryptase gamma 1                                                |
| TPSB2    | 16p13.3 | tryptase beta 2                                                 |
| TPSAB1   | 16p13.3 | tryptase alpha/beta 1                                           |
| TPSD1    | 16p13.3 | tryptase delta 1                                                |
| UBE2I    | 16p13.3 | ubiquitin conjugating enzyme E2 I                               |
| BAIAP3   | 16p13.3 | BAI1 associated protein 3                                       |
| TSR3     | 16p13.3 | TSR3 ribosome maturation factor                                 |
| GNPTG    | 16p13.3 | N-acetylglucosamine-1-phosphate transferase subunit gamma       |
| UNKL     | 16p13.3 | unk like zinc finger                                            |
| C16orf91 | 16p13.3 | chromosome 16 open reading frame 91                             |
| PERCC1   | 16p13.3 | proline and glutamate rich with coiled coil 1                   |
| CCDC154  | 16p13.3 | coiled-coil domain containing 154                               |
| CLCN7    | 16p13.3 | chloride voltage-gated channel 7                                |
| PTX4     | 16p13.3 | pentraxin 4                                                     |
| TELO2    | 16p13.3 | telomere maintenance 2                                          |
| IFT140   | 16p13.3 | intraflagellar transport 140                                    |
| TMEM204  | 16p13.3 | transmembrane protein 204                                       |
| CRAMP1   | 16p13.3 | cramped chromatin regulator homolog 1                           |
| CRAMP1   | 16p13.3 | cramped chromatin regulator homolog 1                           |
| JPT2     | 16p13.3 | Jupiter microtubule associated homolog 2                        |
| MAPK8IP3 | 16p13.3 | mitogen-activated protein kinase 8 interacting protein 3        |
| NME3     | 16p13.3 | NME/NM23 nucleoside diphosphate kinase 3                        |
| MRPS34   | 16p13.3 | mitochondrial ribosomal protein S34                             |
| EME2     | 16p13.3 | essential meiotic structure-specific endonuclease subunit 2     |

|             |         |                                                                |
|-------------|---------|----------------------------------------------------------------|
| SPSB3       | 16p13.3 | splA/ryanodine receptor domain and SOCS box containing 3       |
| NUBP2       | 16p13.3 | NUBP iron-sulfur cluster assembly factor 2, cytosolic          |
| IGFALS      | 16p13.3 | insulin like growth factor binding protein acid labile subunit |
| HAGH        | 16p13.3 | Hydroxy acyl glutathione hydrolase                             |
| FAHD1       | 16p13.3 | fumarylacetoacetate hydrolase domain containing 1              |
| MEIOB       | 16p13.3 | meiosis specific with OB-fold                                  |
| LINC00254   | 16p13.3 | long intergenic non-protein coding RNA 254                     |
| LINC02124   | 16p13.3 | long intergenic non-protein coding RNA 2124                    |
| HS3ST6      | 16p13.3 | heparan sulfate-glucosamine 3-sulfotransferase 6               |
| MSRB1       | 16p13.3 | methionine sulfoxide reductase B1                              |
| RPL3L       | 16p13.3 | ribosomal protein L3 like                                      |
| NDUFB10     | 16p13.3 | NADH:ubiquinone oxidoreductase subunit B10                     |
| RPS2        | 16p13.3 | ribosomal protein S2                                           |
| SNORA10     | 16p13.3 | small nucleolar RNA, H/ACA box 10                              |
| SNORA64     | 16p13.3 | small nucleolar RNA, H/ACA box 64                              |
| SNHG9       | 16p13.3 | small nucleolar RNA host gene 9                                |
| SNORA78     | 16p13.3 | small nucleolar RNA, H/ACA box 78                              |
| RNF151      | 16p13.3 | ring finger protein 151                                        |
| TBL3        | 16p13.3 | transducin beta like 3                                         |
| NOXO1       | 16p13.3 | NADPH oxidase organizer 1                                      |
| GFER        | 16p13.3 | growth factor, augmenter of liver regeneration                 |
| SYNGR3      | 16p13.3 | synaptogyrin 3                                                 |
| ZNF598      | 16p13.3 | zinc finger protein 598, E3 ubiquitin ligase                   |
| NPW         | 16p13.3 | neuropeptide W                                                 |
| SLC9A3R2    | 16p13.3 | SLC9A3 regulator 2                                             |
| NTHL1       | 16p13.3 | nth like DNA glycosylase 1                                     |
| TSC2        | 16p13.3 | TSC complex subunit 2                                          |
| <b>PKD1</b> | 16p13.3 | polycystin 1, transient receptor potential channel interacting |
| RAB26       | 16p13.3 | RAB26, member RAS oncogene family                              |
| SNHG19      | 16p13.3 | small nucleolar RNA host gene 19                               |
| SNORD60     | 16p13.3 | small nucleolar RNA, C/D box 60                                |
| TRAF7       | 16p13.3 | TNF receptor associated factor 7                               |
| CASKIN1     | 16p13.3 | CASK interacting protein 1                                     |
| MLST8       | 16p13.3 | MTOR associated protein, LST8 homolog                          |
| BRICD5      | 16p13.3 | BRICHOS domain containing 5                                    |
| PGP         | 16p13.3 | phosphoglycolate phosphatase                                   |
| E4F1        | 16p13.3 | E4F transcription factor 1                                     |
| DNASE1L2    | 16p13.3 | deoxyribonuclease 1 like 2                                     |
| ECI1        | 16p13.3 | enoyl-CoA delta isomerase 1                                    |
| RNPS1       | 16p13.3 | RNA binding protein with serine rich domain 1                  |
| ABCA3       | 16p13.3 | ATP binding cassette subfamily A member 3                      |
| ABCA17P     | 16p13.3 | ATP binding cassette subfamily A member 17, pseudogene         |
| CCNF        | 16p13.3 | cyclin F                                                       |

|            |         |                                                                  |
|------------|---------|------------------------------------------------------------------|
| TEDC2      | 16p13.3 | tubulin epsilon and delta complex 2                              |
| TEDC2      | 16p13.3 | tubulin epsilon and delta complex 2                              |
| NTN3       | 16p13.3 | netrin 3                                                         |
| TBC1D24    | 16p13.3 | TBC1 domain family member 24                                     |
| ATP6V0C    | 16p13.3 | ATPase H <sup>+</sup> transporting V0 subunit c                  |
| AMDHD2     | 16p13.3 | amidohydrolase domain containing 2                               |
| CEMP1      | 16p13.3 | cementum protein 1                                               |
| PDPK1      | 16p13.3 | 3-phosphoinositide dependent protein kinase 1                    |
| LOC652276  | 16p13.3 | potassium channel tetramerization domain containing 5 pseudogene |
| KCTD5      | 16p13.3 | potassium channel tetramerization domain containing 5            |
| PRSS27     | 16p13.3 | serine protease 27                                               |
| SRRM2-AS1  | 16p13.3 | SRRM2 antisense RNA 1                                            |
| SRRM2      | 16p13.3 | serine/arginine repetitive matrix 2                              |
| ELOB       | 16p13.3 | elongin B                                                        |
| PRSS33     | 16p13.3 | serine protease 33                                               |
| SNORA3C    | 16p13.3 | small nucleolar RNA, H/ACA box 3C                                |
| PRSS41     | 16p13.3 | serine protease 41                                               |
| PRSS21     | 16p13.3 | serine protease 21                                               |
| ZG16B      | 16p13.3 | zymogen granule protein 16B                                      |
| PRSS22     | 16p13.3 | serine protease 22                                               |
| FLYWCH2    | 16p13.3 | FLYWCH family member 2                                           |
| FLYWCH1    | 16p13.3 | FLYWCH-type zinc finger 1                                        |
| KREMEN2    | 16p13.3 | kringle containing transmembrane protein 2                       |
| PAQR4      | 16p13.3 | progesterone and adiponectin receptor family member 4            |
| PKMYT1     | 16p13.3 | protein kinase, membrane associated tyrosine/threonine 1         |
| CLDN9      | 16p13.3 | claudin 9                                                        |
| CLDN6      | 16p13.3 | claudin 6                                                        |
| TNFRSF12A  | 16p13.3 | TNF receptor superfamily member 12A                              |
| HCFC1R1    | 16p13.3 | host cell factor C1 regulator 1                                  |
| THOC6      | 16p13.3 | THO complex 6                                                    |
| BICDL2     | 16p13.3 | BICD family like cargo adaptor 2                                 |
| BICDL2     | 16p13.3 | BICD family like cargo adaptor 2                                 |
| MMP25      | 16p13.3 | matrix metalloproteinase 25                                      |
| MMP25-AS1  | 16p13.3 | MMP25 antisense RNA 1                                            |
| IL32       | 16p13.3 | interleukin 32                                                   |
| ZSCAN10    | 16p13.3 | zinc finger and SCAN domain containing 10                        |
| ZNF205     | 16p13.3 | zinc finger protein 205                                          |
| ZNF213-AS1 | 16p13.3 | ZNF213 antisense RNA 1                                           |
| ZNF213     | 16p13.3 | zinc finger protein 213                                          |
| CASP16P    | 16p13.3 | caspase 16, pseudogene                                           |
| CASP16P    | 16p13.3 | caspase 16, pseudogene                                           |
| OR1F1      | 16p13.3 | olfactory receptor family 1 subfamily F member 1                 |
| OR1F2P     | 16p13.3 | olfactory receptor family 1 subfamily F member 2 pseudogene      |

|             |         |                                                            |
|-------------|---------|------------------------------------------------------------|
| ZNF200      | 16p13.3 | zinc finger protein 200                                    |
| MEFV        | 16p13.3 | MEFV innate immunity regulator, pyrin                      |
| LINC00921   | 16p13.3 | long intergenic non-protein coding RNA 921                 |
| ZNF263      | 16p13.3 | zinc finger protein 263                                    |
| TIGD7       | 16p13.3 | tigger transposable element derived 7                      |
| ZNF75A      | 16p13.3 | zinc finger protein 75a                                    |
| OR2C1       | 16p13.3 | olfactory receptor family 2 subfamily C member 1           |
| MTRNR2L4    | 16p13.3 | MT-RNR2 like 4 (pseudogene)                                |
| ZSCAN32     | 16p13.3 | zinc finger and SCAN domain containing 32                  |
| ZNF174      | 16p13.3 | zinc finger protein 174                                    |
| ZNF597      | 16p13.3 | zinc finger protein 597                                    |
| NAA60       | 16p13.3 | N-alpha-acetyltransferase 60, NatF catalytic subunit       |
| C16orf90    | 16p13.3 | chromosome 16 open reading frame 90                        |
| CLUAP1      | 16p13.3 | clusterin associated protein 1                             |
| NLRC3       | 16p13.3 | NLR family CARD domain containing 3                        |
| SLX4        | 16p13.3 | SLX4 structure-specific endonuclease subunit               |
| DNASE1      | 16p13.3 | deoxyribonuclease 1                                        |
| TRAP1       | 16p13.3 | TNF receptor associated protein 1                          |
| CREBBP      | 16p13.3 | CREB binding protein                                       |
| LINC02861   | 16p13.3 | long intergenic non-protein coding RNA 2861                |
| ADCY9       | 16p13.3 | adenylate cyclase 9                                        |
| SRL         | 16p13.3 | sarcolumenin                                               |
| LINC01569   | 16p13.3 | long intergenic non-protein coding RNA 1569                |
| TFAP4       | 16p13.3 | transcription factor AP-4                                  |
| GLIS2       | 16p13.3 | GLIS family zinc finger 2                                  |
| GLIS2-AS1   | 16p13.3 | GLIS2 antisense RNA 1                                      |
| CORO7-PAM16 | 16p13.3 | CORO7-PAM16 readthrough                                    |
| PAM16       | 16p13.3 | presequence translocase associated motor 16                |
| CORO7       | 16p13.3 | coronin 7                                                  |
| VASN        | 16p13.3 | vasorin                                                    |
| DNAJA3      | 16p13.3 | DnaJ heat shock protein family (Hsp40) member A3           |
| NMRAL1      | 16p13.3 | NmrA like redox sensor 1                                   |
| HMOX2       | 16p13.3 | heme oxygenase 2                                           |
| CDIP1       | 16p13.3 | cell death inducing p53 target 1                           |
| C16orf96    | 16p13.3 | chromosome 16 open reading frame 96                        |
| UBALD1      | 16p13.3 | UBA like domain containing 1                               |
| MGRN1       | 16p13.3 | mahogunin ring finger 1                                    |
| NUDT16L1    | 16p13.3 | nudix hydrolase 16 like 1                                  |
| ANKS3       | 16p13.3 | ankyrin repeat and sterile alpha motif domain containing 3 |
| ZNF500      | 16p13.3 | zinc finger protein 500                                    |
| SEPTIN12    | 16p13.3 | septin 12                                                  |
| SMIM22      | 16p13.3 | small integral membrane protein 22                         |
| ROGDI       | 16p13.3 | rogdi atypical leucine zipper                              |
| GLYR1       | 16p13.3 | glyoxylate reductase 1 homolog                             |
| UBN1        | 16p13.3 | ubinuclein 1                                               |

|           |                |                                                                    |
|-----------|----------------|--------------------------------------------------------------------|
| PPL       | 16p13.3        | periplakin                                                         |
| SEC14L5   | 16p13.3        | SEC14 like lipid binding 5                                         |
| NAGPA     | 16p13.3        | N-acetylglucosamine-1-phosphodiester alpha-N-acetylglucosaminidase |
| NAGPA-AS1 | 16p13.3        | NAGPA antisense RNA 1                                              |
| C16orf89  | 16p13.3        | chromosome 16 open reading frame 89                                |
| ALG1      | 16p13.3        | ALG1 chitobiosyldiphosphodolichol beta-mannosyltransferase         |
| EEF2KMT   | 16p13.3        | eukaryotic elongation factor 2 lysine methyltransferase            |
| LINC01570 | 16p13.3        | long intergenic non-protein coding RNA 1570                        |
| RBFOX1    | 16p13.3        | RNA binding fox-1 homolog 1                                        |
| TMEM114   | 16p13.2        | transmembrane protein 114                                          |
| METTL22   | 16p13.2        | methyltransferase 22, Kin17 lysine                                 |
| ABAT      | 16p13.2        | 4-aminobutyrate aminotransferase                                   |
| TMEM186   | 16p13.2        | transmembrane protein 186                                          |
| PMM2      | 16p13.2        | phosphomannomutase 2                                               |
| CARHSP1   | 16p13.2        | calcium regulated heat stable protein 1                            |
| USP7      | 16p13.2        | ubiquitin specific peptidase 7                                     |
| C16orf72  | 16p13.2        | chromosome 16 open reading frame 72                                |
| LINC02177 | 16p13.2        | long intergenic non-protein coding RNA 2177                        |
| LINC01177 | 16p13.2        | long intergenic non-protein coding RNA 1177                        |
| LINC01195 | 16p13.2        | long intergenic non-protein coding RNA 1195                        |
| GRIN2A    | 16p13.2        | glutamate ionotropic receptor NMDA type subunit 2A                 |
| ATF7IP2   | 16p13.2-p13.13 | activating transcription factor 7 interacting protein 2            |
| LINC01290 | 16p13.13       | long intergenic non-protein coding RNA 1290                        |
| EMP2      | 16p13.13       | epithelial membrane protein 2                                      |
| TEKT5     | 16p13.13       | tektin 5                                                           |
| NUBP1     | 16p13.13       | NUBP iron-sulfur cluster assembly factor 1, cytosolic              |
| TVP23A    | 16p13.13       | trans-golgi network vesicle protein 23 homolog A                   |
| CIITA     | 16p13.13       | class II major histocompatibility complex transactivator           |
| DEXI      | 16p13.13       | Dexi homolog                                                       |
| CLEC16A   | 16p13.13       | C-type lectin domain containing 16A                                |
| SOCS1     | 16p13.13       | suppressor of cytokine signaling 1                                 |
| TNP2      | 16p13.13       | transition protein 2                                               |
| PRM3      | 16p13.13       | protamine 3                                                        |
| PRM2      | 16p13.13       | protamine 2                                                        |
| PRM1      | 16p13.13       | protamine 1                                                        |
| RMI2      | 16p13.13       | RecQ mediated genome instability 2                                 |
| LITAF     | 16p13.13       | lipopolysaccharide induced TNF factor                              |
| SNN       | 16p13.13       | stannin                                                            |
| TXNDC11   | 16p13.13       | thioredoxin domain containing 11                                   |
| ZC3H7A    | 16p13.13       | zinc finger CCCH-type containing 7A                                |
| BCAR4     | 16p13.13       | breast cancer anti-estrogen resistance 4                           |
| RSL1D1    | 16p13.13       | ribosomal L1 domain containing 1                                   |
| GSPT1     | 16p13.13       | G1 to S phase transition 1                                         |

|               |                 |                                                                             |
|---------------|-----------------|-----------------------------------------------------------------------------|
| NP1PB2        | 16p13.13        | nuclear pore complex interacting protein family member B2                   |
| TNFRSF17      | 16p13.13        | TNF receptor superfamily member 17                                          |
| SNX29         | 16p13.13-p13.12 | sorting nexin 29                                                            |
| CPPED1        | 16p13.12        | calcineurin like phosphoesterase domain containing 1                        |
| SHISA9        | 16p13.12        | shisa family member 9                                                       |
| ERCC4         | 16p13.12        | ERCC excision repair 4, endonuclease catalytic subunit                      |
| LINC02185     | 16p13.12        | long intergenic non-protein coding RNA 2185                                 |
| LINC02186     | 16p13.12        | long intergenic non-protein coding RNA 2186                                 |
| MRTFB         | 16p13.12        | myocardin related transcription factor B                                    |
| MIR193BHG     | 16p13.12        | MIR193b-365a host gene                                                      |
| LINC02130     | 16p13.12        | long intergenic non-protein coding RNA 2130                                 |
| PARN          | 16p13.12        | poly(A)-specific ribonuclease                                               |
| BFAR          | 16p13.12        | bifunctional apoptosis regulator                                            |
| PLA2G10       | 16p13.12        | phospholipase A2 group X                                                    |
| NPIPA2        | 16p13.11        | nuclear pore complex interacting protein family member A2                   |
| NPIPA3        | 16p13.11        | nuclear pore complex interacting protein family member A3                   |
| ABCC6P2       | 16p13.11        | ATP binding cassette subfamily C member 6 pseudogene 2                      |
| NOMO3         | 16p13.11        | NODAL modulator 3                                                           |
| NOMO1         | 16p13.11        | NODAL modulator 1                                                           |
| PKD1P3-NPIPA1 | 16p13.11        | PKD1P3-NPIPA1 readthrough                                                   |
| NPIPA1        | 16p13.11        | nuclear pore complex interacting protein family member A1                   |
| PDXDC1        | 16p13.11        | pyridoxal dependent decarboxylase domain containing 1                       |
| NTAN1         | 16p13.11        | N-terminal asparagine amidase                                               |
| RRN3          | 16p13.11        | RRN3 homolog, RNA polymerase I transcription factor                         |
| PKD1P6-NPIPP1 | 16p13.11        | PKD1P6-NPIPP1 readthrough                                                   |
| NPIPA5        | 16p13.11        | nuclear pore complex interacting protein family member A5                   |
| NPIPA5        | 16p13.11        | nuclear pore complex interacting protein family member A5                   |
| MPV17L        | 16p13.11        | MPV17 mitochondrial inner membrane protein like                             |
| BMERB1        | 16p13.11        | bMERB domain containing 1                                                   |
| MARF1         | 16p13.11        | meiosis regulator and mRNA stability factor 1                               |
| NDE1          | 16p13.11        | nudE neurodevelopment protein 1                                             |
| MYH11         | 16p13.11        | myosin heavy chain 11                                                       |
| CEP20         | 16p13.11        | centrosomal protein 20                                                      |
| ABCC1         | 16p13.11        | ATP binding cassette subfamily C member 1                                   |
| ABCC6         | 16p13.11        | ATP binding cassette subfamily C member 6                                   |
| NOMO2         | 16p12.3         | NODAL modulator 2                                                           |
| PKD1P4-NPIPA8 | 16p12.3         | PKD1P4-NPIPA8 readthrough                                                   |
| PKD1P1        | 16p13.11        | polycystin 1, transient receptor potential channel interacting pseudogene 1 |

|                     |               |                                                                  |
|---------------------|---------------|------------------------------------------------------------------|
| NPIPA8              | 16p12.3       | nuclear pore complex interacting protein family member A8        |
| NPIPA7              | 16p13.11      | nuclear pore complex interacting protein family member A7        |
| XYLT1               | 16p12.3       | xylosyltransferase 1                                             |
| PKD1P5-LOC105376752 | 16p12.3       | PKD1P5-LOC105376752 readthrough                                  |
| ABCC6P1             | 16p12.3       | ATP binding cassette subfamily C member 6 pseudogene 1           |
| RPS15A              | 16p12.3       | ribosomal protein S15a                                           |
| ARL6IP1             | 16p12.3       | ADP ribosylation factor like GTPase 6 interacting protein 1      |
| SMG1                | 16p12.3       | SMG1 nonsense mediated mRNA decay associated PI3K related kinase |
| TMC7                | 16p12.3       | transmembrane channel like 7                                     |
| COQ7                | 16p12.3       | coenzyme Q7, hydroxylase                                         |
| ITPRIPL2            | 16p12.3       | ITPRIP like 2                                                    |
| SYT17               | 16p12.3       | synaptotagmin 17                                                 |
| CLEC19A             | 16p12.3       | C-type lectin domain containing 19A                              |
| TMC5                | 16p12.3       | transmembrane channel like 5                                     |
| GDE1                | 16p12.3       | glycerophosphodiester phosphodiesterase 1                        |
| CCP110              | 16p12.3       | centriolar coiled-coil protein 110                               |
| VPS35L              | 16p12.3       | VPS35 endosomal protein sorting factor like                      |
| KNOP1               | 16p12.3       | lysine rich nucleolar protein 1                                  |
| IQCK                | 16p12.3       | IQ motif containing K                                            |
| GPRC5B              | 16p12.3       | G protein-coupled receptor class C group 5 member B              |
| GPR139              | 16p12.3       | G protein-coupled receptor 139                                   |
| GP2                 | 16p12.3       | glycoprotein 2                                                   |
| UMOD                | 16p12.3       | uromodulin                                                       |
| PDILT               | 16p12.3       | protein disulfide isomerase like, testis expressed               |
| ACSM5               | 16p12.3       | acyl-CoA synthetase medium chain family member 5                 |
| ACSM2A              | 16p12.3       | acyl-CoA synthetase medium chain family member 2A                |
| ACSM2B              | 16p12.3       | acyl-CoA synthetase medium chain family member 2B                |
| ACSM1               | 16p12.3       | acyl-CoA synthetase medium chain family member 1                 |
| THUMPD1             | 16p12.3       | THUMP domain containing 1                                        |
| ACSM3               | 16p12.3       | acyl-CoA synthetase medium chain family member 3                 |
| ERI2                | 16p12.3       | ERI1 exoribonuclease family member 2                             |
| REXO5               | 16p12.3       | RNA exonuclease 5                                                |
| DCUN1D3             | 16p12.3       | defective in cullin neddylation 1 domain containing 3            |
| LYRM1               | 16p12.3       | LYR motif containing 1                                           |
| DNAH3               | 16p12.3       | dynein axonemal heavy chain 3                                    |
| ZP2                 | 16p12.3-p12.2 | zona pellucida glycoprotein 2                                    |
| ANKS4B              | 16p12.2       | ankyrin repeat and sterile alpha motif domain containing 4B      |
| CRYM                | 16p12.2       | crystallin mu                                                    |
| NIIPB3              | 16p12.2       | nuclear pore complex interacting protein family member B3        |
| SMG1P3              | 16p12.2       | SMG1 pseudogene 3                                                |



|           |                 |                                                                       |
|-----------|-----------------|-----------------------------------------------------------------------|
| RRN3P3    | 16p12.2         | RRN3 pseudogene 3                                                     |
| METTL9    | 16p12.2         | methyltransferase like 9                                              |
| IGSF6     | 16p12.2         | immunoglobulin superfamily member 6                                   |
| OTOA      | 16p12.2 16p12.2 | otoancorin                                                            |
| OTOAP1    | 16p12.2         | OTOA pseudogene 1                                                     |
| RRN3P1    | 16p12.2         | RRN3 pseudogene 1                                                     |
| NPIP4     | 16p12.2         | nuclear pore complex interacting protein family member B4             |
| NPIP5     | 16p12.2         | nuclear pore complex interacting protein family member B5             |
| UQCRC2    | 16p12.2         | ubiquinol-cytochrome c reductase core protein 2                       |
| PDZD9     | 16p12.2         | PDZ domain containing 9                                               |
| MOSMO     | 16p12.2         | modulator of smoothened                                               |
| MOSMO     | 16p12.2         | modulator of smoothened                                               |
| VWA3A     | 16p12.2         | von Willebrand factor A domain containing 3A                          |
| SDR42E2   | 16p12.2         | short chain dehydrogenase/reductase family 42E, member 2              |
| EEF2K     | 16p12.2         | eukaryotic elongation factor 2 kinase                                 |
| POLR3E    | 16p12.2         | RNA polymerase III subunit E                                          |
| CDR2      | 16p12.2         | cerebellar degeneration related protein 2                             |
| MFSD13B   | 16p12.2         | major facilitator superfamily domain containing 13B (pseudogene)      |
| HS3ST2    | 16p12.2         | heparan sulfate-glucosamine 3-sulfotransferase 2                      |
| USP31     | 16p12.2         | ubiquitin specific peptidase 31                                       |
| SCNN1G    | 16p12.2         | sodium channel epithelial 1 subunit gamma                             |
| SCNN1B    | 16p12.2         | sodium channel epithelial 1 subunit beta                              |
| COG7      | 16p12.2         | component of oligomeric golgi complex 7                               |
| GGA2      | 16p12.2         | golgi associated, gamma adaptin ear containing, ARF binding protein 2 |
| EARS2     | 16p12.2         | glutamyl-tRNA synthetase 2, mitochondrial                             |
| UBFD1     | 16p12.2         | ubiquitin family domain containing 1                                  |
| NDUFAB1   | 16p12.2         | NADH:ubiquinone oxidoreductase subunit AB1                            |
| PALB2     | 16p12.2         | partner and localizer of BRCA2                                        |
| DCTN5     | 16p12.2         | dynactin subunit 5                                                    |
| PLK1      | 16p12.2         | polo like kinase 1                                                    |
| ERN2      | 16p12.2         | endoplasmic reticulum to nucleus signaling 2                          |
| CHP2      | 16p12.2         | calcineurin like EF-hand protein 2                                    |
| PRKCB     | 16p12.2-p12.1   | protein kinase C beta                                                 |
| LINC02194 | 16p12.1         | long intergenic non-protein coding RNA 2194                           |
| CACNG3    | 16p12.1         | calcium voltage-gated channel auxiliary subunit gamma 3               |
| RBBP6     | 16p12.1         | RB binding protein 6, ubiquitin ligase                                |
| LINC01567 | 16p12.1         | long intergenic non-protein coding RNA 1567                           |
| TNRC6A    | 16p12.1         | trinucleotide repeat containing adaptor 6A                            |
| SLC5A11   | 16p12.1         | solute carrier family 5 member 11                                     |
| ARHGAP17  | 16p12.1         | Rho GTPase activating protein 17                                      |

|            |               |                                                                           |
|------------|---------------|---------------------------------------------------------------------------|
| LOC554206  | 16p12.1       | leucine carboxyl methyltransferase 1 pseudogene                           |
| LINC02175  | 16p12.1       | long intergenic non-protein coding RNA 2175                               |
| LCMT1-AS1  | 16p12.1       | LCMT1 antisense RNA 1                                                     |
| LCMT1      | 16p12.1       | leucine carboxyl methyltransferase 1                                      |
| LCMT1-AS2  | 16p12.1       | LCMT1 antisense RNA 2                                                     |
| AQP8       | 16p12.1       | aquaporin 8                                                               |
| ZKSCAN2    | 16p12.1       | zinc finger with KRAB and SCAN domains 2                                  |
| HS3ST4     | 16p12.1       | heparan sulfate-glucosamine 3-sulfotransferase 4                          |
| C16orf82   | 16p12.1       | chromosome 16 open reading frame 82                                       |
| KDM8       | 16p12.1       | lysine demethylase 8                                                      |
| NSMCE1     | 16p12.1       | NSE1 homolog, SMC5-SMC6 complex component                                 |
| NSMCE1-DT  | 16p12.1       | NSMCE1 divergent transcript                                               |
| IL4R       | 16p12.1       | interleukin 4 receptor                                                    |
| IL21R      | 16p12.1       | interleukin 21 receptor                                                   |
| IL21R-AS1  | 16p12.1       | IL21R antisense RNA 1                                                     |
| GTF3C1     | 16p12.1       | general transcription factor IIIC subunit 1                               |
| GSG1L      | 16p12.1       | GSG1 like                                                                 |
| XPO6       | 16p12.1       | exportin 6                                                                |
| SBK1       | 16p12.1       | SH3 domain binding kinase 1                                               |
| NPIPB6     | 16p12.1       | nuclear pore complex interacting protein family member B6                 |
| EIF3C      | 16p11.2       | eukaryotic translation initiation factor 3 subunit C                      |
| EIF3CL     | 16p12.1       | eukaryotic translation initiation factor 3 subunit C like                 |
| CLN3       | 16p12.1       | CLN3 lysosomal/endosomal transmembrane protein, battenin                  |
| APOBR      | 16p12.1       | apolipoprotein B receptor                                                 |
| IL27       | 16p12.1-p11.2 | interleukin 27                                                            |
| NUPR1      | 16p11.2       | nuclear protein 1, transcriptional regulator                              |
| SGF29      | 16p11.2       | SAGA complex associated factor 29                                         |
| SGF29      | 16p11.2       | SAGA complex associated factor 29                                         |
| SULT1A2    | 16p11.2       | sulfotransferase family 1A member 2                                       |
| SULT1A1    | 16p11.2       | sulfotransferase family 1A member 1                                       |
| NPIPB8     | 16p11.2       | nuclear pore complex interacting protein family member B8                 |
| NPIPB9     | 16p11.2       | nuclear pore complex interacting protein family member B9                 |
| ATXN2L     | 16p11.2       | ataxin 2 like                                                             |
| TUFM       | 16p11.2       | Tu translation elongation factor, mitochondrial                           |
| SH2B1      | 16p11.2       | SH2B adaptor protein 1                                                    |
| ATP2A1     | 16p11.2       | ATPase sarcoplasmic/endoplasmic reticulum Ca <sup>2+</sup> transporting 1 |
| ATP2A1-AS1 | 16p11.2       | ATP2A1 antisense RNA 1                                                    |
| RABEP2     | 16p11.2       | rabaptin, RAB GTPase binding effector protein 2                           |
| CD19       | 16p11.2       | CD19 molecule                                                             |
| NFATC2IP   | 16p11.2       | nuclear factor of activated T cells 2 interacting protein                 |
| SPNS1      | 16p11.2       | sphingolipid transporter 1 (putative)                                     |

|               |         |                                                            |
|---------------|---------|------------------------------------------------------------|
| LAT           | 16p11.2 | linker for activation of T cells                           |
| RRN3P2        | 16p11.2 | RRN3 pseudogene 2                                          |
| SNX29P2       | 16p11.2 | sorting nexin 29 pseudogene 2                              |
| NPIP1B11      | 16p11.2 | nuclear pore complex interacting protein family member B11 |
| SMG1P6        | 16p11.2 | SMG1 pseudogene 6                                          |
| BOLA2-SMG1P6  | 16p11.2 | BOLA2-SMG1P6 readthrough                                   |
| LOC606724     | 16p11.2 | coronin 1A pseudogene                                      |
| BOLA2         | 16p11.2 | bolA family member 2                                       |
| BOLA2B        | 16p11.2 | bolA family member 2B                                      |
| SLX1A         | 16p11.2 | SLX1 homolog A, structure-specific endonuclease subunit    |
| SLX1B         | 16p11.2 | SLX1 homolog B, structure-specific endonuclease subunit    |
| SLX1A-SULT1A3 | 16p11.2 | SLX1A-SULT1A3 readthrough (NMD candidate)                  |
| SLX1B-SULT1A4 | 16p11.2 | SLX1B-SULT1A4 readthrough (NMD candidate)                  |
| SULT1A3       | 16p11.2 | sulfotransferase family 1A member 3                        |
| SULT1A4       | 16p11.2 | sulfotransferase family 1A member 4                        |
| LOC388242     | 16p11.2 | SAGA complex associated factor 29 pseudogene               |
| LOC613038     | 16p11.2 | SAGA complex associated factor 29 pseudogene               |
| NPIP1B12      | 16p11.2 | nuclear pore complex interacting protein family member B12 |
| SMG1P2        | 16p11.2 | SMG1 pseudogene 2                                          |
| SPN           | 16p11.2 | sialophorin                                                |
| QPRT          | 16p11.2 | quinolinate phosphoribosyltransferase                      |
| C16orf54      | 16p11.2 | chromosome 16 open reading frame 54                        |
| ZG16          | 16p11.2 | zymogen granule protein 16                                 |
| KIF22         | 16p11.2 | kinesin family member 22                                   |
| MAZ           | 16p11.2 | MYC associated zinc finger protein                         |
| PRRT2         | 16p11.2 | proline rich transmembrane protein 2                       |
| PAGR1         | 16p11.2 | PAXIP1 associated glutamate rich protein 1                 |
| MVP           | 16p11.2 | major vault protein                                        |
| CDIPT         | 16p11.2 | CDP-diacylglycerol--inositol 3-phosphatidyltransferase     |
| CDIPTOSP      | 16p11.2 | CDIP transferase opposite strand, pseudogene               |
| CDIPTOSP      | 16p11.2 | CDIP transferase opposite strand, pseudogene               |
| SEZ6L2        | 16p11.2 | seizure related 6 homolog like 2                           |
| ASPHD1        | 16p11.2 | aspartate beta-hydroxylase domain containing 1             |
| KCTD13        | 16p11.2 | potassium channel tetramerization domain containing 13     |
| TMEM219       | 16p11.2 | transmembrane protein 219                                  |
| TAOK2         | 16p11.2 | TAO kinase 2                                               |
| HIRIP3        | 16p11.2 | HIRA interacting protein 3                                 |
| INO80E        | 16p11.2 | INO80 complex subunit E                                    |
| DOC2A         | 16p11.2 | double C2 domain alpha                                     |
| C16orf92      | 16p11.2 | chromosome 16 open reading frame 92                        |
| TLCD3B        | 16p11.2 | TLC domain containing 3B                                   |
| ALDOA         | 16p11.2 | aldolase, fructose-bisphosphate A                          |
| PPP4C         | 16p11.2 | protein phosphatase 4 catalytic subunit                    |

|          |         |                                                                              |
|----------|---------|------------------------------------------------------------------------------|
| TBX6     | 16p11.2 | T-box transcription factor 6                                                 |
| YPEL3    | 16p11.2 | yippee like 3                                                                |
| GDPD3    | 16p11.2 | glycerophosphodiester phosphodiesterase domain containing 3                  |
| MAPK3    | 16p11.2 | mitogen-activated protein kinase 3                                           |
| CORO1A   | 16p11.2 | coronin 1A                                                                   |
| NPIP13   | 16p11.2 | nuclear pore complex interacting protein family, member B13                  |
| CD2BP2   | 16p11.2 | CD2 cytoplasmic tail binding protein 2                                       |
| TBC1D10B | 16p11.2 | TBC1 domain family member 10B                                                |
| MYLPF    | 16p11.2 | myosin light chain, phosphorylatable, fast skeletal muscle                   |
| SEPTIN1  | 16p11.2 | septin 1                                                                     |
| ZNF48    | 16p11.2 | zinc finger protein 48                                                       |
| ZNF771   | 16p11.2 | zinc finger protein 771                                                      |
| SNORA80C | 16p11.2 | small nucleolar RNA, H/ACA box 80C                                           |
| DCTPP1   | 16p11.2 | dCTP pyrophosphatase 1                                                       |
| SEPHS2   | 16p11.2 | selenophosphate synthetase 2                                                 |
| ITGAL    | 16p11.2 | integrin subunit alpha L                                                     |
| ZNF768   | 16p11.2 | zinc finger protein 768                                                      |
| ZNF747   | 16p11.2 | zinc finger protein 747                                                      |
| ZNF764   | 16p11.2 | zinc finger protein 764                                                      |
| ZNF688   | 16p11.2 | zinc finger protein 688                                                      |
| ZNF785   | 16p11.2 | zinc finger protein 785                                                      |
| ZNF689   | 16p11.2 | zinc finger protein 689                                                      |
| PRR14    | 16p11.2 | proline rich 14                                                              |
| FBRS     | 16p11.2 | fibrosin                                                                     |
| SRCAP    | 16p11.2 | Snf2 related CREBBP activator protein                                        |
| SNORA30  | 16p11.2 | small nucleolar RNA, H/ACA box 30                                            |
| TMEM265  | 16p11.2 | transmembrane protein 265                                                    |
| PHKG2    | 16p11.2 | phosphorylase kinase catalytic subunit gamma 2                               |
| RNF40    | 16p11.2 | ring finger protein 40                                                       |
| ZNF629   | 16p11.2 | zinc finger protein 629                                                      |
| MIR762HG | 16p11.2 | MIR762 host gene                                                             |
| BCL7C    | 16p11.2 | BAF chromatin remodeling complex subunit BCL7C                               |
| CTF1     | 16p11.2 | cardiotrophin 1                                                              |
| FBXL19   | 16p11.2 | F-box and leucine rich repeat protein 19                                     |
| ORAI3    | 16p11.2 | ORAI calcium release-activated calcium modulator 3                           |
| SETD1A   | 16p11.2 | SET domain containing 1A, histone lysine methyltransferase                   |
| HSD3B7   | 16p11.2 | hydroxy-delta-5-steroid dehydrogenase, 3 beta- and steroid delta-isomerase 7 |
| STX1B    | 16p11.2 | syntaxin 1B                                                                  |
| STX4     | 16p11.2 | syntaxin 4                                                                   |
| ZNF668   | 16p11.2 | zinc finger protein 668                                                      |
| ZNF646   | 16p11.2 | zinc finger protein 646                                                      |
| PRSS53   | 16p11.2 | serine protease 53                                                           |

|              |         |                                                                         |
|--------------|---------|-------------------------------------------------------------------------|
| VKORC1       | 16p11.2 | vitamin K epoxide reductase complex subunit 1                           |
| BCKDK        | 16p11.2 | branched chain keto acid dehydrogenase kinase                           |
| KAT8         | 16p11.2 | lysine acetyltransferase 8                                              |
| PRSS8        | 16p11.2 | serine protease 8                                                       |
| PRSS36       | 16p11.2 | serine protease 36                                                      |
| FUS          | 16p11.2 | FUS RNA binding protein                                                 |
| PYCARD       | 16p11.2 | PYD and CARD domain containing                                          |
| PYCARD-AS1   | 16p11.2 | PYCARD antisense RNA 1                                                  |
| TRIM72       | 16p11.2 | tripartite motif containing 72                                          |
| PYDC1        | 16p11.2 | pyrin domain containing 1                                               |
| ITGAM        | 16p11.2 | integrin subunit alpha M                                                |
| ITGAX        | 16p11.2 | integrin subunit alpha X                                                |
| ITGAD        | 16p11.2 | integrin subunit alpha D                                                |
| COX6A2       | 16p11.2 | cytochrome c oxidase subunit 6A2                                        |
| ZNF843       | 16p11.2 | zinc finger protein 843                                                 |
| ARMC5        | 16p11.2 | armadillo repeat containing 5                                           |
| TGFB111      | 16p11.2 | transforming growth factor beta 1 induced transcript 1                  |
| SLC5A2       | 16p11.2 | solute carrier family 5 member 2                                        |
| RUSF1        | 16p11.2 | RUS family member 1                                                     |
| AHSP         | 16p11.2 | alpha hemoglobin stabilizing protein                                    |
| LINC02190    | 16p11.2 | long intergenic non-protein coding RNA 2190                             |
| FRG2KP       | 16p11.2 | FSHD region gene 2 family member K, pseudogene                          |
| YBX3P1       | 16p11.2 | Y-box binding protein 3 pseudogene 1                                    |
| VN1R3        | 16p11.2 | vomeroneasal 1 receptor 3                                               |
| ZNF267       | 16p11.2 | zinc finger protein 267                                                 |
| LOC102723753 | -       | HECT and RLD domain containing E3 ubiquitin protein ligase 2 pseudogene |
| HERC2P4      | 16p11.2 | HERC2 pseudogene 4                                                      |
| TP53TG3D     | 16p11.2 | TP53 target 3D                                                          |
| LOC390705    | 16p11.2 | protein phosphatase 2 regulatory subunit B'', beta pseudogene           |
| LOC102723655 | -       | TP53-target gene 3 protein                                              |
| TP53TG3E     | 16p11.2 | TP53 target 3 family member E                                           |
| TP53TG3      | 16p11.2 | TP53 target 3                                                           |
| TP53TG3B     | 16p11.2 | TP53 target 3B                                                          |
| TP53TG3F     | 16p11.2 | TP53 target 3 family member F                                           |
| TP53TG3C     | 16p11.2 | TP53 target 3C                                                          |
| ENPP7P13     | 16p11.2 | ectonucleotide pyrophosphatase/phosphodiesterase 7 pseudogene 13        |
| CCNYL3       | 16p11.2 | cyclin Y like 3 (pseudogene)                                            |
| UBE2MP1      | 16p11.2 | ubiquitin conjugating enzyme E2 M pseudogene 1                          |
| LINC01566    | 16p11.1 | long intergenic non-protein coding RNA 1566                             |
| FRG2DP       | 16p11.1 | FSHD region gene 2 family member D, pseudogene                          |
| TP53TG3HP    | 16p11.1 | TP53 target 3 family member H, pseudogene                               |
| LINC02167    | 16p11.1 | long intergenic non-protein coding RNA 2167                             |
